# Supplementary material for: Development of anatomically and lesion contrast-guided partial volume correction: new 3D formalisms and validation in phantom and clinical studies
Source: Springer Nature journal article supplement (doi:10.1007/s12149-019-01356-7), 2019-04-08
Supplement: MOESM4 [file 16629448]

Trend line equations and the related determination coefficient(R2) for different lesion volumes at contrast 15:1

| Sphere Volume(mL) | 15:1 |  |
| --- | --- | --- |
|  |  |  |
|  |  |  |
|  |  |  |
|  |  |  |
